# Supplementary material for: Colorectal Cancer Survival in German–Danish Border Regions—A Registry-Based Cohort Study
Source: MDPI journal article supplement (doi:10.3390/cancers15184474), 2023-09-08
Supplement: s1 [file s1]

**Table S1.** Median survival time (mST) in years, number of patients at risk (NaR) and absolute survival (AS) after 1, 5 and 10 years in Schleswig-Holstein, Southern Denmark and Zealand stratified by period of diagnosis.

|               |     | Schleswig-Holstein |         |          | Southern Denmark |         |          | Zealand |         |          |
|---------------|-----|--------------------|---------|----------|------------------|---------|----------|---------|---------|----------|
|               |     | 1 year             | 5 years | 10 years | 1 year           | 5 years | 10 years | 1 year  | 5 years | 10 years |
| <b>Colon</b>  |     |                    |         |          |                  |         |          |         |         |          |
| 2004-07       | mST | 5.8                |         |          | 3.4              |         |          | 3.4     |         |          |
|               | NaR | 5460               | 3098    | 2209     | 2178             | 1021    | 738      | 1639    | 771     | 552      |
|               | AS  | 0.77               | 0.53    | 0.39     | 0.68             | 0.44    | 0.32     | 0.69    | 0.43    | 0.32     |
| 2008-10       | mST | 6.1                |         |          | 4.2              |         |          | 4.3     |         |          |
|               | NaR | 4100               | 2312    | 295      | 1730             | 877     | 105      | 1449    | 743     | 86       |
|               | AS  | 0.79               | 0.53    | 0.39     | 0.71             | 0.48    | 0.35     | 0.74    | 0.47    | 0.33     |
| 2011-13       | mST | 6.5                |         |          | 5.6              |         |          | 5.7     |         |          |
|               | NaR | 3897               | 1928    | -        | 1952             | 902     | -        | 1433    | 692     | -        |
|               | AS  | 0.80               | 0.55    | -        | 0.76             | 0.52    | -        | 0.78    | 0.53    | -        |
| 2014-16       | mST | 3                  |         |          | 3                |         |          | 3       |         |          |
|               | NaR | 3925               | -       | -        | 2430             | -       | -        | 1803    | -       | -        |
|               | AS  | 0.80               | -       | -        | 0.83             | -       | -        | 0.83    | -       | -        |
| <b>Rectum</b> |     |                    |         |          |                  |         |          |         |         |          |
| 2004-07       | mST | 5.9                |         |          | 5.2              |         |          | 4.3     |         |          |
|               | NaR | 3107               | 1818    | 1256     | 1255             | 694     | 478      | 960     | 491     | 353      |
|               | AS  | 0.81               | 0.54    | 0.39     | 0.79             | 0.51    | 0.35     | 0.75    | 0.46    | 0.35     |
| 2008-10       | mST | 5.7                |         |          | 5.7              |         |          | 6.2     |         |          |
|               | NaR | 2204               | 1247    | 147      | 928              | 521     | 68       | 744     | 438     | 48       |
|               | AS  | 0.80               | 0.52    | 0.40     | 0.79             | 0.52    | 0.42     | 0.78    | 0.55    | 0.40     |
| 2011-13       | mST | 6.2                |         |          | 6                |         |          | 6.5     |         |          |
|               | NaR | 2109               | 1074    | -        | 1034             | 540     | -        | 692     | 344     | -        |
|               | AS  | 0.84               | 0.57    | -        | 0.83             | 0.57    | -        | 0.81    | 0.54    | -        |
| 2014-16       | mST | 3                  |         |          | 3                |         |          | 3       |         |          |
|               | NaR | 2101               | -       | -        | 1125             | -       | -        | 880     | -       | -        |
|               | AS  | 0.83               | -       | -        | 0.88             | -       | -        | 0.87    | -       | -        |
