# Supplementary material for: Colorectal Cancer Survival in German–Danish Border Regions—A Registry-Based Cohort Study
Source: MDPI journal article supplement (doi:10.3390/cancers15184474), 2023-09-08
Supplement: s1 [file s1]

**Table S2.** Cox regression models of hazard ratio (HR) of death for cancer registry data of the German-Danish border regions excluding short-term survivors (crude and adjusted for various individual and prognostic factors).

|               |          | Excluding short-term survivors <30 days |                       | Excluding short-term survivors <90 days |                       |
|---------------|----------|-----------------------------------------|-----------------------|-----------------------------------------|-----------------------|
|               |          | <i>Crude Model</i>                      | <i>Fully adjusted</i> | <i>Crude Model</i>                      | <i>Fully adjusted</i> |
|               |          | HR [95 % CI]                            | HR [95 % CI]          | HR [95 % CI]                            | HR [95 % CI]          |
| <b>Colon</b>  | SH 04-07 | Ref.                                    | Ref.                  | Ref.                                    | Ref.                  |
|               | SD 04-07 | 1.26 [1.18; 1.34]                       | 1.33 [1.25; 1.42]     | 1.21 [1.13; 1.30]                       | 1.30 [1.21; 1.39]     |
|               | ZL 04-07 | 1.27 [1.18; 1.36]                       | 1.23 [1.15; 1.32]     | 1.23 [1.15; 1.33]                       | 1.18 [1.09; 1.27]     |
|               | SH 08-10 | 0.99 [0.93; 1.04]                       | 0.93 [0.88; 0.99]     | 0.99 [0.93; 1.05]                       | 0.93 [0.88; 0.99]     |
|               | SD 08-10 | 1.19 [1.11; 1.28]                       | 1.12 [1.04; 1.20]     | 1.15 [1.06; 1.24]                       | 1.05 [0.96; 1.14]     |
|               | ZL 08-10 | 1.19 [1.11; 1.29]                       | 1.09 [1.01; 1.18]     | 1.18 [1.09; 1.28]                       | 1.04 [0.95; 1.13]     |
|               | SH 11-13 | 0.94 [0.88; 0.996]                      | 0.93 [0.87; 0.99]     | 0.97 [0.91; 1.03]                       | 0.94 [0.88; 1.01]     |
|               | SD 11-13 | 1.07 [0.99; 1.15]                       | 1.03 [0.91; 1.09]     | 1.04 [0.96; 1.13]                       | 0.98 [0.90; 1.06]     |
|               | ZL 11-13 | 1.03 [0.94; 1.12]                       | 0.99 [0.92; 1.09]     | 1.03 [0.94; 1.13]                       | 0.96 [0.87; 1.05]     |
|               | SH 14-16 | 0.93 [0.87; 0.999]                      | 0.90 [0.84; 0.97]     | 0.95 [0.88; 1.02]                       | 0.92 [0.85; 0.99]     |
|               | SD 14-16 | 0.72 [0.65; 0.79]                       | 0.77 [0.70; 0.85]     | 0.73 [0.66; 0.81]                       | 0.77 [0.69; 0.85]     |
|               | ZL 14-16 | 0.78 [0.70; 0.86]                       | 0.81 [0.73; 0.89]     | 0.78 [0.70; 0.87]                       | 0.78 [0.69; 0.87]     |
| <b>Rectum</b> | SH 04-07 | Ref.                                    | Ref.                  | Ref.                                    | Ref.                  |
|               | SD 04-07 | 1.12 [1.03; 1.22]                       | 1.17 [1.08; 1.27]     | 1.11 [1.02; 1.21]                       | 1.18 [1.08; 1.28]     |
|               | ZL 04-07 | 1.18 [1.07; 1.29]                       | 1.23 [1.13; 1.35]     | 1.17 [1.06; 1.28]                       | 1.24 [1.13; 1.36]     |
|               | SH 08-10 | 1.05 [0.97; 1.13]                       | 1.0 [0.93; 1.07]      | 1.04 [0.96; 1.12]                       | 0.98 [0.91; 1.06]     |
|               | SD 08-10 | 1.02 [0.92; 1.13]                       | 1.0 [0.90; 1.10]      | 1.01 [0.91; 1.12]                       | 0.99 [0.89; 1.09]     |
|               | ZL 08-10 | 1.05 [0.94; 1.17]                       | 1.0 [0.90; 1.12]      | 1.02 [0.92; 1.15]                       | 0.97 [0.86; 1.08]     |
|               | SH 11-13 | 0.92 [0.84; 0.99]                       | 0.88 [0.81; 0.95]     | 0.92 [0.84; 0.999]                      | 0.87 [0.79; 0.95]     |
|               | SD 11-13 | 0.92 [0.82; 1.02]                       | 0.86 [0.78; 0.96]     | 0.91 [0.81; 1.02]                       | 0.85 [0.76; 0.95]     |
|               | ZL 11-13 | 0.98 [0.87; 1.11]                       | 0.85 [0.75; 0.96]     | 0.99 [0.87; 1.12]                       | 0.83 [0.73; 0.95]     |
|               | SH 14-16 | 0.95 [0.86; 1.04]                       | 0.87 [0.79; 0.96]     | 0.96 [0.87; 1.06]                       | 0.88 [0.79; 0.98]     |
|               | SD 14-16 | 0.68 [0.59; 0.77]                       | 0.64 [0.56; 0.74]     | 0.71 [0.62; 0.82]                       | 0.67 [0.58; 0.78]     |
|               | ZL 14-16 | 0.77 [0.66; 0.89]                       | 0.69 [0.60; 0.80]     | 0.78 [0.67; 0.92]                       | 0.70 [0.60; 0.82]     |
